# Supplementary material for: An efficient biosensor using a functionalized microneedle of Cu2O-based CoCu-LDH for glucose detection
Source: Royal Society of Chemistry journal article supplement (doi:10.1039/d3ra05957j), 2023-01-01
Supplement: d3ra05957j1.pdf [file d3ra05957j1.pdf]

Electronic Supplementary Material (ESI) for RSC Advances.

This journal is © The Royal Society of Chemistry 2023

Supporting information

## **An efficient biosensor using functionalized microneedle of Cu<sub>2</sub>O-based CoCu-LDH for glucose detection**

Jialei Zhu,<sup>a</sup> Fuqin Wang,<sup>a</sup> Jiaying Chen<sup>a</sup> and Chang Liu\*<sup>a</sup>

a. College of Pharmacy, Jinzhou Medical University, Jinzhou, Liaoning, P. R. China.

## **Table**

**Table S1.** The performance comparison of CoCu-LDH/Cu<sub>2</sub>O/ANE with other published glucose sensors.

**Table S2.** The influence of different detection methods on the glucose test in human serum samples.

**Table S1.**

| Electrode                      | substrate | Linear Range (mM) | Sensitivity ( $\mu\text{A mM}^{-1}$ ) | Detection limit ( $\mu\text{M}$ ) | References |
|--------------------------------|-----------|-------------------|---------------------------------------|-----------------------------------|------------|
| Au@Cu <sub>2</sub> O           | GCE       | 0.05~2.0          | 50.48                                 | 18                                | 1          |
| Ag@Ni-MOF                      | GCE       | 0.005~0.5         | 11.31                                 | 5                                 | 2          |
| CuO/Cu <sub>2</sub> O          | GCE       | 0.1~6             | 137.67                                | 1                                 | 3          |
| Cu <sub>x</sub> S <sub>y</sub> | SPCE      | 0.2~16            | 13                                    | 0.2                               | 4          |
| NiCeO <sub>x</sub> /MWCNTs     | GCE       | 0.007~0.466       | 84.27                                 | 1.8                               | 5          |
|                                |           | 0.466~3.44        | 53.22                                 |                                   |            |
| CoCu-LDH/Cu <sub>2</sub> O     | ANE       | 0.03~0.40         | 116.13                                | 0.46                              | This work  |
|                                |           | 0.40~6.00         | 52.08                                 |                                   |            |

The performance comparison of CoCu-LDH/Cu<sub>2</sub>O/ANE with other published glucose sensors.

**Table S2.**

| Hospital Detection (mM) | Co-LDH/Cu <sub>2</sub> O/ANE<br>Detection (mM) | Sinocare SG-103 Detection<br>(mM) |
|-------------------------|------------------------------------------------|-----------------------------------|
| 0.498                   | 0.49                                           | 0.48                              |
| 0.518                   | 0.51                                           | 0.55                              |

The influence of different detection methods on the glucose test in human serum samples.

## Figure captions

**Fig. S1.** Effects of electrodeposition conditions on CoCu-LDH/Cu<sub>2</sub>O/ANE in the presence of 4 mM glucose (A) different electrodeposition potentials for Cu<sub>2</sub>O NPs, (B) different electrodeposition potentials for CoCu-LDH, (C) different electrodeposition time for Cu<sub>2</sub>O NPs, and (D) different electrodeposition time for CoCu-LDH. Inset: the effect of different preparation conditions on  $\Delta I_p$ .

**Fig. S2.** (A) FE-SEM images of CoCu-LDH/Cu<sub>2</sub>O/ANE preparation with the optimum electrodeposition parameters. (B) FE-SEM images of CoCu-LDH/Cu<sub>2</sub>O/ANE electrode prepared by CoCu-LDH with electrodeposition potential of -0.65 V and deposition time of 350 s.

**Fig. S3.** Optimizing the conditions of (A) the electrodeposition concentration of CuSO<sub>4</sub> in the presence of 4 mM glucose, (B) the electrodeposition molar ratio of Co(NO<sub>3</sub>)<sub>2</sub>/CuSO<sub>4</sub> in the presence of 4 mM glucose, (C) the applied potential of CoCu-LDH/Cu<sub>2</sub>O/ANE sensor with the continuous addition of 0.2 mM glucose. Inset: the effect of different preparation conditions on  $\Delta I_p$ . All optimal conditions were obtained in the 0.1 M NaOH solution.

**Fig. S4.** (A) Amperogram of the CoCu-LDH/Cu<sub>2</sub>O/ANE sensor during successive addition of 0.5 mM glucose, 0.05 mM DA, 0.05 mM AA, 0.05 mM UA, 0.05 mM NaCl into 0.1 M NaOH solution at the applied potential of 0.55 V. (B) The  $\Delta I_p$  of five independent CoCu-LDH/Cu<sub>2</sub>O/ANE (E1, E2, E3, E4, E5) towards 4 mM glucose in 0.1 M NaOH. (C) The electrocatalytic efficiency of the CoCu-LDH/Cu<sub>2</sub>O/ANE sensor toward 1 mM glucose in 15 days. (D) FE-SEM images of CoCu-LDH/Cu<sub>2</sub>O/ANE after repeated usage.

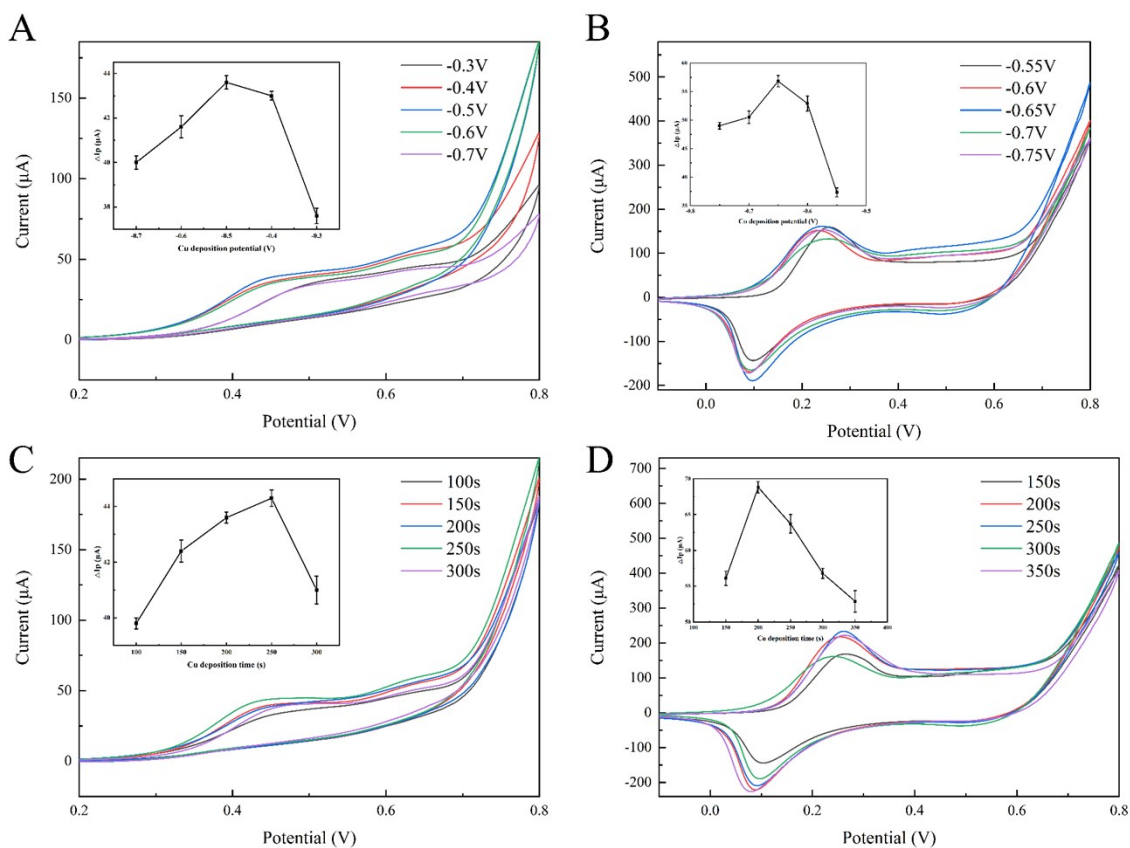

**Fig. S1.** Effects of electrodeposition conditions on CoCu-LDH/ $\text{Cu}_2\text{O}$ /ANE in the presence of 4 mM glucose (A) different electrodeposition potentials for  $\text{Cu}_2\text{O}$  NPs , (B) different electrodeposition potentials for CoCu-LDH, (C) different electrodeposition time for  $\text{Cu}_2\text{O}$  NPs, and (D) different electrodeposition time for CoCu-LDH. Inset: the effect of different preparation conditions on  $\Delta I_p$ .

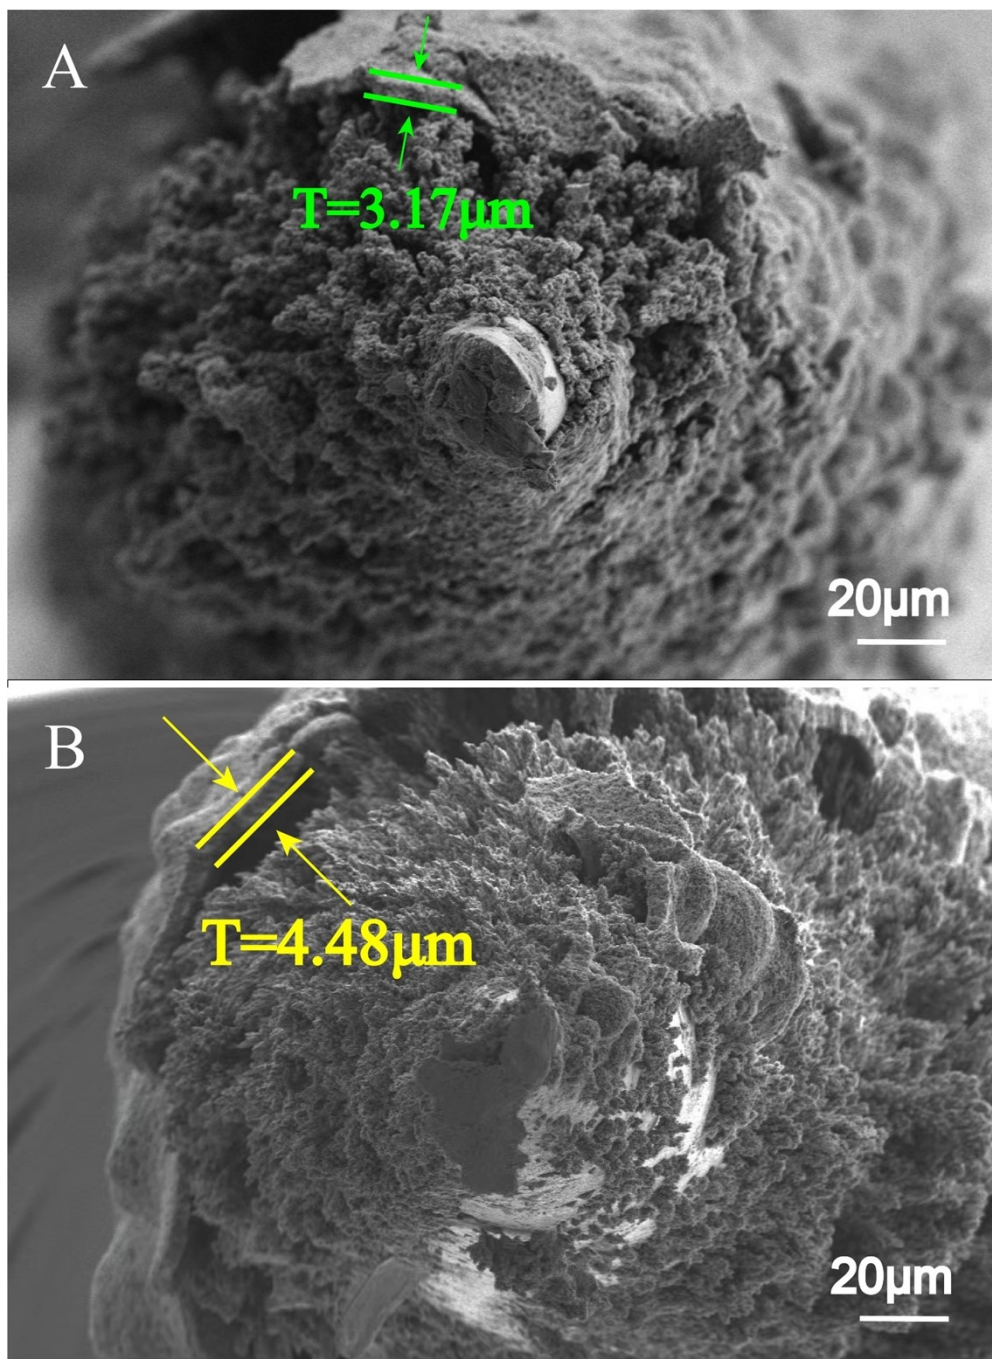

**Fig. S2.** (A) FE-SEM images of CoCu-LDH/Cu<sub>2</sub>O/ANE preparation with the optimum electrodeposition parameters. (B) FE-SEM images of CoCu-LDH/Cu<sub>2</sub>O/ANE electrode prepared by CoCu-LDH with electrodeposition potential of -0.65 V and deposition time of 350 s.

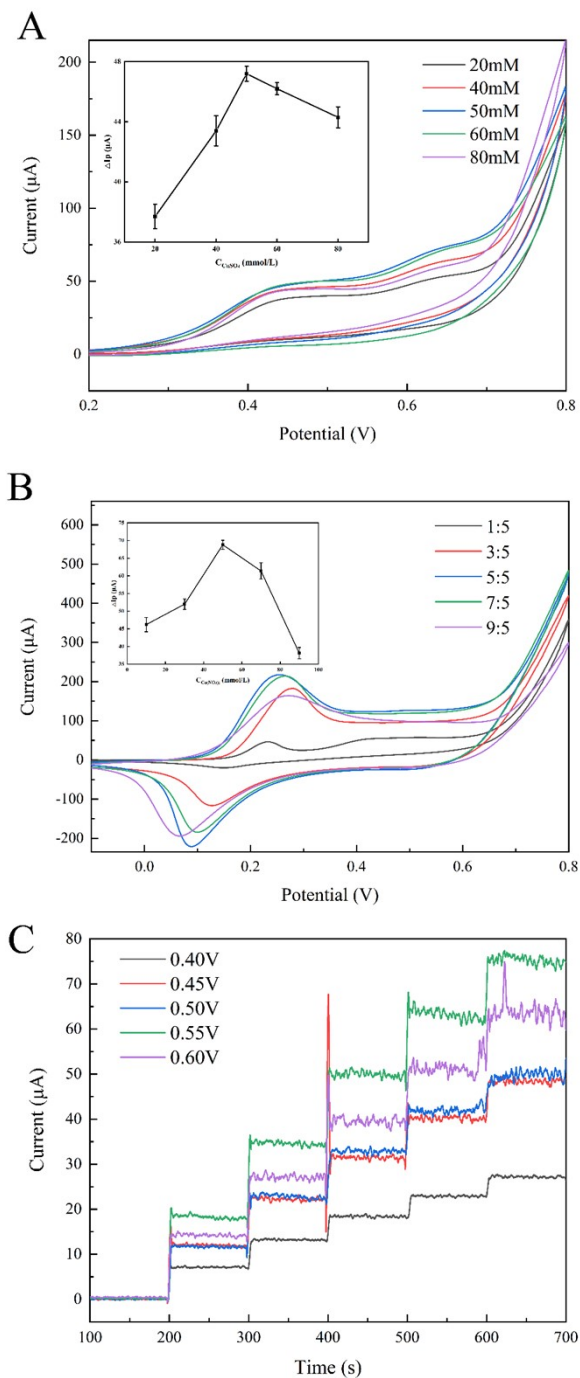

**Fig. S3.** Optimizing the conditions of (A) the electrodeposition concentration of  $\text{CuSO}_4$  in the presence of 4 mM glucose, (B) the electrodeposition molar ratio of  $\text{Co}(\text{NO}_3)_2/\text{CuSO}_4$  in the presence of 4 mM glucose, (C) the applied potential of CoCu-LDH/ $\text{Cu}_2\text{O}$ /ANE sensor with the continuous addition of 0.2 mM glucose. Inset: the effect of different preparation conditions on  $\Delta\text{Ip}$ . All optimal conditions were obtained in the 0.1 M NaOH solution.





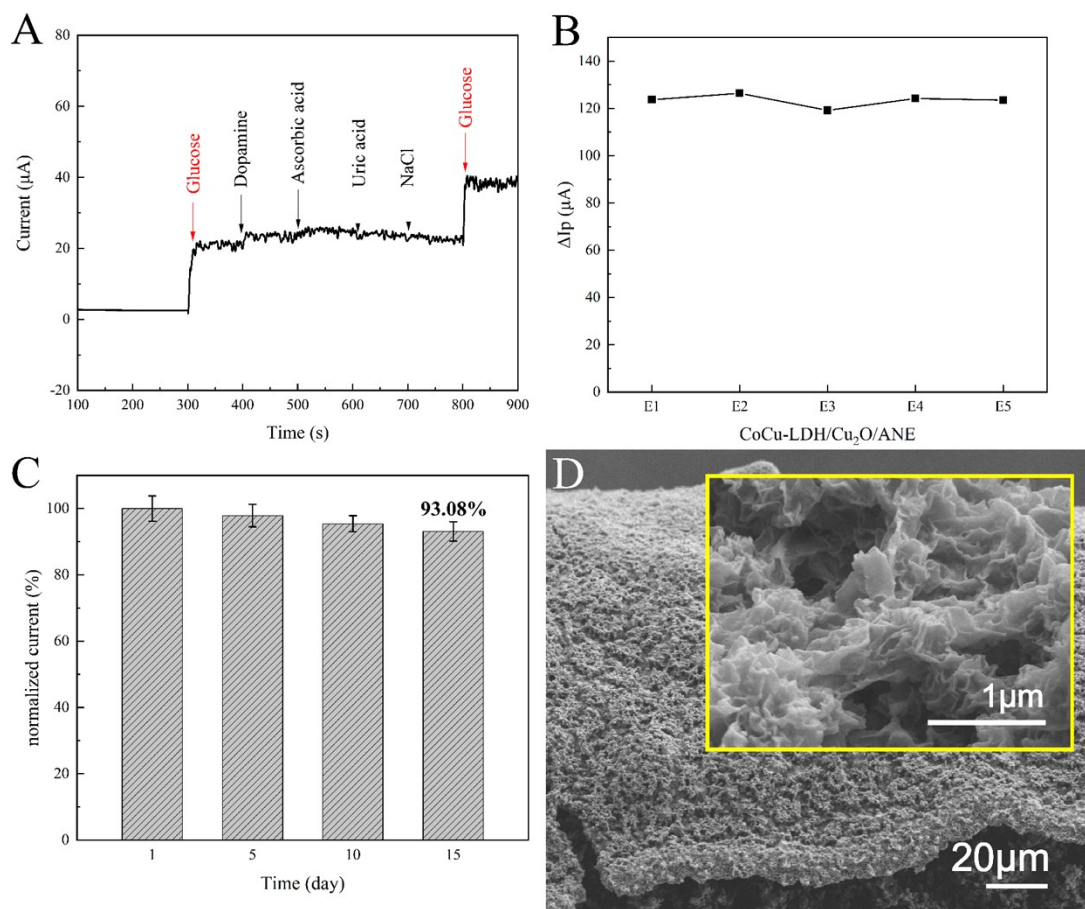

**Fig. S4.** (A) Amperogram of the CoCu-LDH/Cu<sub>2</sub>O/ANE sensor during successive addition of 0.5 mM glucose, 0.05 mM DA, 0.05 mM AA, 0.05 mM UA, 0.05 mM NaCl into 0.1 M NaOH solution at the applied potential of 0.55 V. (B) The  $\Delta I_p$  of five independent CoCu-LDH/Cu<sub>2</sub>O/ANE (E1, E2, E3, E4, E5) towards 4 mM glucose in 0.1 M NaOH. (C) The electrocatalytic efficiency of the CoCu-LDH/Cu<sub>2</sub>O/ANE sensor toward 1 mM glucose in 15 days. (D) FE-SEM images of CoCu-LDH/Cu<sub>2</sub>O/ANE after repeated usage.

1. Y. Su, H. Guo, Z. Wang, Y. Long, W. Li and Y. Tu, *Sensors and Actuators B-Chemical*, 2018, **255**, 2510-2519.
2. J. Cao, J. Yun, N. Zhang, Y. Wei, H. Yang and Z. Xu, *Synthetic Metals*, 2021, **282**.
3. R. Li, X. Liu, H. Wang, Y. Wu, K. C. Chan and Z. Lu, *Electrochimica Acta*, 2019, **299**, 470-478.
4. P. Tetyana, N. Mphuthi, A. N. Jijana, N. Moloto, P. M. Shumbula, A. Skepu, L. S. Vilakazi and L. Sikhwivhilu, *Journal*, 2023, **13**.
5. M. Waqas, L. Yang, Y. Wei, Y. Sun, F. Yang, Y. Fan and W. Chen, *Electrochimica Acta*, 2023, **440**.

## References
